# Supplementary material for: The saturation of the gas phase acidity of nHF/AlF3 and nHF/GeF4 (n = 1–6) superacids caused by increasing the number of surrounding HF molecules
Source: Royal Society of Chemistry journal article supplement (doi:10.1039/c6ra02199a), 2016-01-01
Supplement: c6ra02199a1.pdf [file c6ra02199a1.pdf]

***Supporting Information***

**The Saturation of the Gas Phase Acidity of the  $n\text{HF}/\text{AlF}_3$  and  $n\text{HF}/\text{GeF}_4$  ( $n=1-6$ )  
Superacids Caused by Increasing Number of Surrounding HF Molecules**

Marcin Czapla<sup>1</sup>, Iwona Anusiewicz<sup>1,2</sup>, and Piotr Skurski<sup>1,2,\*</sup>

<sup>1</sup> *Laboratory of Quantum Chemistry, Faculty of Chemistry, University of Gdańsk  
Wita Stwosza 63, 80-308 Gdańsk, Poland*

<sup>2</sup> *Department of Technical Physics and Applied Mathematics  
Gdańsk University of Technology  
Narutowicza 11/12, 80-233 Gdańsk, Poland*

---

\* corresponding author: piotr.skurski@ug.edu.pl

The Cartesian coordinates (in Å) of the B3LYP/6-311++G(d,p) lowest energy structures of the  $n\text{HF}/\text{AlF}_3$  superacids ( $n=1-6$ ). The corresponding B3LYP/6-311++G(d,p) and QCISD/6-311++G(d,p) energies are given in a.u.

### HF/AlF<sub>3</sub> (1)

|    |              |              |              |
|----|--------------|--------------|--------------|
| 13 | -0.052742000 | 0.307135000  | 0.000000000  |
| 9  | 0.572194000  | 0.860846000  | 1.440159000  |
| 9  | -1.618069000 | -0.313995000 | 0.000000000  |
| 9  | 0.572194000  | -1.613145000 | 0.000000000  |
| 9  | 0.572194000  | 0.860846000  | -1.440159000 |
| 1  | -0.200971000 | -2.143723000 | 0.000000000  |

$$E_{\text{B3LYP}} = -642.809121$$

$$E_{\text{QCISD}} = -641.546427$$

### 2HF/AlF<sub>3</sub> (1)

|    |              |              |              |
|----|--------------|--------------|--------------|
| 13 | 0.687734134  | -0.145096908 | 0.000000000  |
| 9  | -0.620862594 | -1.267970603 | 0.000000000  |
| 9  | 1.486980814  | -0.010440205 | -1.452528001 |
| 9  | 1.486980814  | -0.010440205 | 1.452528001  |
| 9  | -0.533096561 | 1.334873741  | 0.000000000  |
| 9  | -2.608094832 | 0.139930189  | 0.000000000  |
| 1  | -1.481963822 | 1.042715063  | 0.000000000  |
| 1  | -2.073837349 | -0.663553342 | 0.000000000  |

$$E_{\text{B3LYP}} = -743.321036$$

$$E_{\text{QCISD}} = -741.853556$$

### 3HF/AlF<sub>3</sub> (1)

|    |              |              |              |
|----|--------------|--------------|--------------|
| 13 | 1.085379360  | 0.261339009  | 0.000000000  |
| 9  | 0.195071829  | -1.392017228 | 0.000000000  |
| 9  | -0.355071944 | 1.211732319  | 0.000000000  |
| 9  | 1.896668126  | 0.289646855  | 1.453544992  |
| 9  | 1.896668126  | 0.289646855  | -1.453544992 |
| 9  | -2.746770685 | 0.811396148  | 0.000000000  |
| 1  | -0.813696562 | -1.507389933 | 0.000000000  |
| 1  | -1.848369537 | 1.171276456  | 0.000000000  |
| 9  | -2.152537293 | -1.530655259 | 0.000000000  |
| 1  | -2.531054079 | -0.623460666 | 0.000000000  |

$$E_{\text{B3LYP}} = -843.826916$$

$$E_{\text{QCISD}} = -842.155583$$

### 4HF/AlF<sub>3</sub> (1)

|    |              |              |              |
|----|--------------|--------------|--------------|
| 13 | 0.000000000  | 0.000000000  | 0.381708742  |
| 9  | 0.000000000  | 0.000000000  | 2.051036742  |
| 9  | -1.823871087 | 0.844406607  | 0.262447742  |
| 9  | 1.823871087  | -0.844406607 | 0.262447742  |
| 9  | 0.657463214  | 1.308986008  | -0.529745258 |
| 9  | -0.657463214 | -1.308986008 | -0.529745258 |
| 1  | 2.485747874  | -0.303026316 | -0.198337258 |
| 1  | -2.485747874 | 0.303026316  | -0.198337258 |
| 9  | 3.030645354  | 0.897132425  | -0.967911258 |
| 1  | 2.180359386  | 1.340919906  | -0.958372258 |
| 9  | -3.030645354 | -0.897132425 | -0.967911258 |
| 1  | -2.180359386 | -1.340919906 | -0.958372258 |

$$E_{\text{B3LYP}} = -944.324434$$

$$E_{\text{QCISD}} = -942.454081$$

### 5HF/AlF<sub>3</sub> (1)

|    |              |              |              |
|----|--------------|--------------|--------------|
| 13 | -0.436562000 | -0.325796000 | 0.314542000  |
| 9  | 0.616351000  | 1.040167000  | 0.244830000  |
| 9  | -0.580148000 | -1.211922000 | 1.723373000  |
| 9  | 1.005860000  | -1.440039000 | -0.413696000 |
| 9  | -1.934108000 | 0.936660000  | 0.860326000  |
| 9  | -1.388162000 | -0.649007000 | -1.087676000 |
| 9  | 2.944659000  | 1.707102000  | -0.029249000 |
| 9  | -3.512739000 | 0.564283000  | -0.984684000 |
| 1  | -2.693160000 | 0.941741000  | 0.257479000  |
| 1  | 1.950737000  | -1.171094000 | -0.482359000 |
| 1  | -2.824396000 | -0.022439000 | -1.303115000 |
| 1  | 1.996592000  | 1.629765000  | 0.123189000  |
| 9  | 3.285337000  | -0.661770000 | -0.569494000 |
| 1  | 3.312096000  | 0.288121000  | -0.377811000 |

$E_{\text{B3LYP}} = -1044.828397$

$E_{\text{QCISD}} = -1042.754639$

### 6HF/AlF<sub>3</sub> (1)

|    |              |              |              |
|----|--------------|--------------|--------------|
| 13 | 0.000000000  | 0.000000000  | 0.506402425  |
| 9  | -1.083919700 | -1.004808453 | -0.384871574 |
| 9  | 1.083919700  | 1.004808453  | -0.384871574 |
| 9  | 0.000000000  | 0.000000000  | 2.178669423  |
| 9  | 1.342771905  | -1.448887465 | 0.391494426  |
| 9  | -1.342771905 | 1.448887465  | 0.391494426  |
| 9  | 3.637631346  | -1.030594598 | -0.256721073 |
| 9  | 3.393813525  | 1.254569467  | -1.125770572 |
| 9  | -3.637631346 | 1.030594598  | -0.256721073 |
| 1  | -2.287540636 | 1.321553670  | 0.155576926  |
| 1  | 2.287540636  | -1.321553670 | 0.155576926  |
| 1  | -3.703916883 | 0.140803379  | -0.632754573 |
| 1  | 2.461005891  | 1.334204597  | -0.900112074 |
| 1  | 3.703916883  | -0.140803379 | -0.632754573 |
| 1  | -2.461005891 | -1.334204597 | -0.900112074 |
| 9  | -3.393813525 | -1.254569467 | -1.125770572 |

$E_{\text{B3LYP}} = -1145.332138$

$E_{\text{QCISD}} = -1143.055084$

The Cartesian coordinates (in Å) of the B3LYP/6-311++G(d,p) higher energy structures of the  $n\text{HF}/\text{AlF}_3$  superacids ( $n=1-6$ ). The corresponding B3LYP/6-311++G(d,p) and QCISD/6-311++G(d,p) energies are given in a.u.

### 2HF/AlF<sub>3</sub> (2)

|    |              |              |              |
|----|--------------|--------------|--------------|
| 13 | 0.000000000  | 0.000000000  | 0.075590212  |
| 9  | -2.036414827 | 0.500951207  | -0.109263788 |
| 9  | 2.036414827  | -0.500951207 | -0.109263788 |
| 9  | 0.532255869  | 1.357597359  | -0.787051788 |
| 9  | -0.532255869 | -1.357597359 | -0.787051788 |
| 9  | 0.000000000  | 0.000000000  | 1.745763212  |
| 1  | 2.348762414  | 0.252372217  | -0.570100788 |
| 1  | -2.348762414 | -0.252372217 | -0.570100788 |

$$E_{\text{B3LYP}} = -743.307101$$

$$E_{\text{QCISD}} = -741.844198$$

### 2HF/AlF<sub>3</sub> (3)

|    |              |              |              |
|----|--------------|--------------|--------------|
| 13 | -0.644757000 | 0.245744000  | 0.186463000  |
| 9  | -1.095843000 | -1.133573000 | -1.195119000 |
| 9  | -1.407318000 | -0.710748000 | 1.332598000  |
| 9  | 1.030853000  | 0.174077000  | 0.130034000  |
| 9  | -1.397072000 | 1.597232000  | -0.416943000 |
| 1  | -1.541927000 | -1.860188000 | -0.805920000 |
| 1  | 2.745462000  | 0.042054000  | 0.038199000  |
| 9  | 3.666970000  | -0.079937000 | -0.034603000 |

$$E_{\text{B3LYP}} = -743.303476$$

$$E_{\text{QCISD}} = -741.839513$$

### 3HF/AlF<sub>3</sub> (2)

|    |              |              |              |
|----|--------------|--------------|--------------|
| 13 | 0.437202000  | -0.195353000 | -0.045558000 |
| 9  | 1.094688000  | -0.456793000 | 1.492711000  |
| 9  | 0.886200000  | -1.061796000 | -1.399815000 |
| 9  | 2.193561000  | 1.038134000  | -0.150198000 |
| 9  | -1.239018000 | -1.196215000 | 0.307499000  |
| 9  | -0.525318000 | 1.223671000  | -0.258953000 |
| 9  | -2.866563000 | 0.586777000  | -0.008751000 |
| 1  | -2.045285000 | -0.652033000 | 0.226084000  |
| 1  | 2.558384000  | 0.857929000  | 0.692387000  |
| 1  | -2.088675000 | 1.129691000  | -0.168648000 |

$$E_{\text{B3LYP}} = -843.816389$$

$$E_{\text{QCISD}} = -842.149545$$

### 3HF/AlF<sub>3</sub> (3)

|    |              |              |              |
|----|--------------|--------------|--------------|
| 13 | 0.127625000  | 0.652708000  | -0.115926000 |
| 9  | 0.994420000  | -0.287580000 | 1.294686000  |
| 9  | 1.106999000  | -0.113125000 | -1.301004000 |
| 9  | -1.440544000 | 0.061957000  | -0.063303000 |
| 9  | 0.426234000  | 2.258747000  | 0.174075000  |
| 9  | 2.529881000  | -1.604463000 | 0.027222000  |
| 1  | 1.692525000  | -0.915649000 | 0.959567000  |
| 1  | 2.177590000  | -1.185476000 | -0.763441000 |
| 1  | -3.044096000 | -0.577407000 | -0.015308000 |
| 9  | -3.893116000 | -0.960723000 | 0.015682000  |

$$E_{\text{B3LYP}} = -843.815076$$

$$E_{\text{QCISD}} = -842.146267$$

### 4HF/AlF<sub>3</sub> (2)

$$E_{\text{B3LYP}} = -944.327311$$

$$E_{\text{QCISD}} = -942.452334$$

|    |              |              |              |
|----|--------------|--------------|--------------|
| 13 | -1.508666343 | 0.143698933  | 0.000000000  |
| 9  | -2.313062605 | 0.266832029  | -1.453339500 |
| 9  | -0.326890641 | 1.586398529  | 0.000000000  |
| 9  | -0.298229664 | -1.081664761 | 0.000000000  |
| 9  | -2.313062605 | 0.266832029  | 1.453339500  |
| 9  | 2.010431928  | 1.615317421  | 0.000000000  |
| 9  | 1.762832033  | -2.368816957 | 0.000000000  |
| 1  | 0.691531767  | 1.586157213  | 0.000000000  |
| 1  | 0.876613936  | -1.987174536 | 0.000000000  |
| 1  | 2.537876474  | 0.782883235  | 0.000000000  |
| 9  | 3.257385715  | -0.442035356 | 0.000000000  |
| 1  | 2.740696436  | -1.266805515 | 0.000000000  |

### 5HF/AlF<sub>3</sub> (2)

|    |              |              |              |
|----|--------------|--------------|--------------|
| 13 | 1.605508000  | 0.128828000  | -0.071361000 |
| 9  | 1.520859000  | -0.056032000 | 1.613467000  |
| 9  | 3.085971000  | 0.107995000  | -0.824597000 |
| 9  | 0.680512000  | -1.328347000 | -0.676289000 |
| 9  | 0.522062000  | 1.375195000  | -0.539436000 |
| 9  | -1.551250000 | -1.868757000 | -0.698794000 |
| 9  | -3.053122000 | -0.067689000 | -0.314281000 |
| 9  | -1.830965000 | 2.054992000  | -0.304126000 |
| 1  | -0.355622000 | -1.578341000 | -0.654971000 |
| 1  | -0.884232000 | 1.901438000  | -0.385940000 |
| 1  | -2.191840000 | -1.130513000 | -0.478822000 |
| 1  | -2.624223000 | 0.802229000  | -0.240496000 |
| 1  | -0.109126000 | -0.268782000 | 2.067843000  |
| 9  | -1.008127000 | -0.373000000 | 1.812954000  |

$$E_{\text{B3LYP}} = -1044.824900$$

$$E_{\text{QCISD}} = -1042.746714$$

### 5HF/AlF<sub>3</sub> (3)

|    |              |              |              |
|----|--------------|--------------|--------------|
| 13 | 0.000000000  | 0.000000000  | 0.160995001  |
| 9  | -0.854381244 | 1.207413566  | 1.039532393  |
| 9  | 0.000000000  | 0.000000000  | -1.523202779 |
| 9  | -1.663784653 | -1.095752335 | 0.244818413  |
| 9  | 1.663784653  | 1.095752335  | 0.244818413  |
| 9  | 0.854381244  | -1.207413566 | 1.039532393  |
| 9  | -3.159911545 | 0.435715958  | 1.415253364  |
| 9  | 3.159911545  | -0.435715958 | 1.415253364  |
| 1  | 2.415974526  | 0.655055992  | 0.680746559  |
| 1  | -2.415974526 | -0.655055992 | 0.680746559  |
| 1  | 2.401325047  | -1.018783284 | 1.436428206  |
| 1  | -2.401325047 | 1.018783284  | 1.436428206  |
| 1  | 0.000000000  | 0.000000000  | -3.224562605 |
| 9  | 0.000000000  | 0.000000000  | -4.158217746 |

$$E_{\text{B3LYP}} = -1044.823960$$

$$E_{\text{QCISD}} = -1042.748596$$

### 5HF/AlF<sub>3</sub> (4)

|    |              |              |              |
|----|--------------|--------------|--------------|
| 13 | -1.907286000 | -0.216426000 | 0.014475000  |
| 9  | -2.466040000 | 0.002268000  | 1.570574000  |
| 9  | -2.941594000 | -0.538399000 | -1.249982000 |
| 9  | -1.160518000 | 1.431734000  | -0.428369000 |
| 9  | -0.451347000 | -1.132142000 | -0.025510000 |
| 9  | 0.840933000  | 2.381691000  | 0.308201000  |
| 9  | 2.932776000  | 1.419610000  | -0.375405000 |
| 9  | 3.495885000  | -0.893118000 | 0.145165000  |
| 1  | -0.287989000 | 1.849468000  | -0.108517000 |
| 1  | 2.790427000  | -1.554908000 | 0.111617000  |
| 1  | 1.703995000  | 1.991265000  | 0.041366000  |
| 1  | 3.186712000  | 0.503693000  | -0.168816000 |
| 1  | 0.747152000  | -1.998699000 | 0.017028000  |
| 9  | 1.600395000  | -2.446898000 | 0.046343000  |

**E<sub>B3LYP</sub> = -1044.819996**

**E<sub>QCISD</sub> = -1042.748294**

### 6HF/AlF<sub>3</sub> (2)

|    |              |              |              |
|----|--------------|--------------|--------------|
| 13 | 0.517843000  | -0.031210000 | -0.041316000 |
| 9  | 0.000308000  | -1.125888000 | 1.168465000  |
| 9  | 1.809369000  | -0.464132000 | -1.093968000 |
| 9  | -0.152968000 | 1.524923000  | -0.189242000 |
| 9  | 1.925918000  | 0.676719000  | 1.201625000  |
| 9  | -0.795772000 | -0.830816000 | -1.256276000 |
| 9  | -1.786167000 | -2.548608000 | 0.158688000  |
| 9  | 3.943149000  | 0.245042000  | -0.109571000 |
| 9  | -2.464964000 | 2.525055000  | -0.123285000 |
| 1  | -1.383097000 | -1.496146000 | -0.838603000 |
| 1  | 2.834876000  | 0.605359000  | 0.861294000  |
| 1  | -1.245239000 | -2.193458000 | 0.856370000  |
| 1  | 3.333072000  | -0.130206000 | -0.745461000 |
| 1  | -1.542804000 | 2.313961000  | -0.181669000 |
| 1  | -3.083092000 | 0.966074000  | 0.160144000  |
| 9  | -3.106170000 | 0.035500000  | 0.290788000  |

**E<sub>B3LYP</sub> = -1145.321814**

**E<sub>QCISD</sub> = -1143.040372**

### 6HF/AlF<sub>3</sub> (3)

|    |              |              |              |
|----|--------------|--------------|--------------|
| 13 | -2.124143000 | -0.312842000 | 0.176423000  |
| 9  | -0.810639000 | -1.358904000 | -0.178885000 |
| 9  | -2.058966000 | 0.237363000  | 1.752590000  |
| 9  | -3.555830000 | -0.750997000 | -0.550983000 |
| 9  | -1.573873000 | 1.191183000  | -0.771496000 |
| 9  | -0.023814000 | 2.834635000  | -0.197348000 |
| 9  | 2.304205000  | 2.309227000  | -0.479918000 |
| 9  | 3.387334000  | 0.509671000  | 0.753320000  |
| 9  | 1.103263000  | -2.859714000 | -0.391295000 |
| 1  | -0.900375000 | 1.913895000  | -0.509984000 |
| 1  | 3.379257000  | -0.403982000 | 0.437899000  |
| 1  | 0.934378000  | 2.633011000  | -0.285050000 |
| 1  | 2.761924000  | 1.603425000  | 0.006001000  |
| 1  | 0.316104000  | -2.308124000 | -0.321378000 |
| 9  | 3.302251000  | -1.793156000 | -0.093100000 |
| 1  | 2.457197000  | -2.245061000 | -0.206945000 |

**E<sub>B3LYP</sub> = -1145.318030**

**E<sub>QCISD</sub> = -1143.045420**

### 6HF/AlF<sub>3</sub> (4)

|    |              |              |              |
|----|--------------|--------------|--------------|
| 13 | 2.384684762  | -0.221766222 | 0.000000000  |
| 9  | 0.763547619  | -0.824324726 | 0.000000000  |
| 9  | 3.146770426  | -0.430592145 | -1.461646958 |
| 9  | 3.146770426  | -0.430592145 | 1.461646958  |
| 9  | 1.872404156  | 1.584795224  | 0.000000000  |
| 9  | -0.328945644 | 2.477402186  | 0.000000000  |
| 9  | -1.556771232 | -1.367556357 | 0.000000000  |
| 9  | -2.325886423 | 0.969031383  | 0.000000000  |
| 9  | -2.733249663 | -3.905446770 | 0.000000000  |
| 1  | 0.944291436  | 1.953514443  | 0.000000000  |
| 1  | -0.580714181 | -1.274335277 | 0.000000000  |
| 1  | -1.119539722 | 1.928614053  | 0.000000000  |
| 1  | -2.130789639 | 0.019323497  | 0.000000000  |
| 1  | -2.364982139 | -3.055172660 | 0.000000000  |
| 1  | -4.081827087 | 1.699599046  | 0.000000000  |
| 9  | -4.876243536 | 2.174783089  | 0.000000000  |

$$E_{\text{B3LYP}} = -1145.300623$$

$$E_{\text{QCISD}} = -1143.024505$$

The Cartesian coordinates (in Å) of the B3LYP/6-311++G(d,p) lowest energy structures of the  $((n-1)\text{HF}/\text{AlF}_4)^-$  anions ( $n=1-6$ ). The corresponding B3LYP/6-311++G(d,p) and QCISD/6-311++G(d,p) energies are given in a.u.:

**AIF<sub>4</sub><sup>-</sup>**

|    |              |              |              |
|----|--------------|--------------|--------------|
| 13 | 0.000000000  | 0.000000000  | -0.000000001 |
| 9  | -0.991466818 | 0.991466818  | -0.991466814 |
| 9  | 0.991466818  | -0.991466818 | -0.991466814 |
| 9  | -0.991466810 | -0.991466810 | 0.991466814  |
| 9  | 0.991466810  | 0.991466810  | 0.991466814  |

**E<sub>B3LYP</sub> = -642.372316****E<sub>QCISD</sub> = -641.101412****(HF/AIF<sub>4</sub>)<sup>-</sup>**

|    |              |              |              |
|----|--------------|--------------|--------------|
| 13 | 0.000000000  | 0.000000000  | -0.705592152 |
| 9  | 1.624687894  | 0.000000000  | -1.233222580 |
| 9  | 0.000000000  | 0.000000000  | 1.033330503  |
| 9  | -0.812343947 | -1.407020989 | -1.233222580 |
| 9  | -0.812343947 | 1.407020989  | -1.233222580 |
| 9  | 0.000000000  | 0.000000000  | 3.531653332  |
| 1  | 0.000000000  | 0.000000000  | 2.578160375  |

**E<sub>B3LYP</sub> = -742.884405****E<sub>QCISD</sub> = -741.410792****(2HF/AIF<sub>4</sub>)<sup>-</sup>**

|    |              |              |              |
|----|--------------|--------------|--------------|
| 13 | 0.000000000  | 0.000000000  | 0.689342582  |
| 9  | 1.387206378  | 0.000000000  | -0.342057776 |
| 9  | -1.387206378 | 0.000000000  | -0.342057776 |
| 9  | 0.000000000  | 1.412519776  | 1.635745501  |
| 9  | 0.000000000  | -1.412519776 | 1.635745501  |
| 9  | -3.495889889 | 0.000000000  | -1.719334503 |
| 9  | 3.495889889  | 0.000000000  | -1.719334503 |
| 1  | -2.698613370 | 0.000000000  | -1.203731834 |
| 1  | 2.698613370  | 0.000000000  | -1.203731834 |

**E<sub>B3LYP</sub> = -843.393642****E<sub>QCISD</sub> = -841.717947****(3HF/AIF<sub>4</sub>)<sup>-</sup>**

|    |              |              |              |
|----|--------------|--------------|--------------|
| 13 | 0.000000000  | 0.000000000  | -0.514444190 |
| 9  | -0.803569497 | 1.391823196  | 0.097186761  |
| 9  | 0.000000000  | 0.000000000  | -2.207479108 |
| 9  | -0.803569497 | -1.391823196 | 0.097186761  |
| 9  | 1.607138993  | 0.000000000  | 0.097186761  |
| 9  | -2.015210589 | -3.490447128 | 0.851733018  |
| 9  | -2.015210589 | 3.490447128  | 0.851733018  |
| 9  | 4.030421177  | 0.000000000  | 0.851733018  |
| 1  | 3.125904307  | 0.000000000  | 0.573905803  |
| 1  | -1.562952154 | -2.707112540 | 0.573905803  |
| 1  | -1.562952154 | 2.707112540  | 0.573905803  |

**E<sub>B3LYP</sub> = -943.900378****E<sub>QCISD</sub> = -942.023011****(4HF/AIF<sub>4</sub>)<sup>-</sup>**



|    |              |              |              |
|----|--------------|--------------|--------------|
| 13 | 0.000000000  | 0.000000000  | 0.000000000  |
| 9  | -0.988148743 | -0.988148745 | 0.988148744  |
| 9  | 0.988148743  | 0.988148745  | 0.988148744  |
| 9  | 0.988148745  | -0.988148743 | -0.988148744 |
| 9  | -0.988148745 | 0.988148743  | -0.988148744 |
| 9  | 2.464621712  | -2.464621705 | -2.464621709 |
| 9  | -2.464621705 | -2.464621712 | 2.464621709  |
| 9  | 2.464621705  | 2.464621712  | 2.464621709  |
| 1  | -1.919978328 | -1.919978333 | 1.919978330  |
| 1  | 1.919978333  | -1.919978328 | -1.919978330 |
| 1  | 1.919978328  | 1.919978333  | 1.919978330  |
| 1  | -1.919978333 | 1.919978328  | -1.919978330 |
| 9  | -2.464621712 | 2.464621705  | -2.464621709 |

$E_{\text{B3LYP}} = -1044.404891$

$E_{\text{QCISD}} = -1042.326175$

**(5HF/AlF<sub>4</sub>)<sup>-</sup>**

|    |              |              |              |
|----|--------------|--------------|--------------|
| 13 | 0.500004389  | -0.336020429 | 0.000000000  |
| 9  | 0.644475297  | -1.302886840 | -1.400654201 |
| 9  | 0.644475297  | -1.302886840 | 1.400654201  |
| 9  | -1.051163492 | 0.409710909  | 0.000000000  |
| 9  | 1.699341326  | 0.879740418  | 0.000000000  |
| 9  | 0.918047805  | -2.728135915 | 3.516797830  |
| 9  | -3.415048996 | 1.109176979  | 0.000000000  |
| 9  | 0.918047805  | -2.728135915 | -3.516797830 |
| 9  | 3.581815276  | 2.624691893  | 0.000000000  |
| 1  | 0.818798636  | -2.206536084 | 2.738607022  |
| 1  | 2.889008412  | 1.986423872  | 0.000000000  |
| 1  | -2.491397550 | 0.852392632  | 0.000000000  |
| 1  | 0.818798636  | -2.206536084 | -2.738607022 |
| 1  | -4.102717363 | 2.629345291  | 0.000000000  |
| 9  | -4.540419614 | 3.459971289  | 0.000000000  |

$E_{\text{B3LYP}} = -1144.905254$

$E_{\text{QCISD}} = -1142.624000$

The Cartesian coordinates (in Å) of the B3LYP/6-311++G(d,p) lowest energy structures of the  $n\text{HF}/\text{GeF}_4$  superacids ( $n=1-6$ ). The corresponding B3LYP/6-311++G(d,p) and QCISD/6-311++G(d,p) energies are given in a.u.

#### HF/GeF<sub>4</sub> (1)

|    |              |              |              |
|----|--------------|--------------|--------------|
| 32 | -0.168038000 | 0.300088000  | 0.000000000  |
| 9  | 1.554728000  | 0.406403000  | 0.000000000  |
| 9  | -0.750992000 | -0.452078000 | 1.425909000  |
| 9  | -0.750992000 | -0.452078000 | -1.425909000 |
| 9  | -0.750992000 | 1.920699000  | 0.000000000  |
| 9  | 1.075528000  | -2.259767000 | 0.000000000  |
| 1  | 1.981690000  | -2.071416000 | 0.000000000  |

$$E_{\text{B3LYP}} = -2577.126797$$

$$E_{\text{QCISD}} = -2574.535547$$

#### 2HF/GeF<sub>4</sub> (1)

|    |              |              |              |
|----|--------------|--------------|--------------|
| 32 | 0.277517000  | 0.611286000  | 0.000000000  |
| 9  | 0.911564000  | -1.015422000 | 0.000000000  |
| 9  | -1.821195000 | -0.964245000 | 0.000000000  |
| 9  | 1.705105000  | 1.576414000  | 0.000000000  |
| 9  | -0.542850000 | 0.986860000  | 1.454110000  |
| 9  | -0.542850000 | 0.986860000  | -1.454110000 |
| 9  | -0.542850000 | -3.231584000 | 0.000000000  |
| 1  | 0.244000000  | -2.726317000 | 0.000000000  |
| 1  | -1.626860000 | -1.884765000 | 0.000000000  |

$$E_{\text{B3LYP}} = -2677.623700$$

$$E_{\text{QCISD}} = -2674.830455$$

#### 3HF/GeF<sub>4</sub> (1)

|    |              |              |              |
|----|--------------|--------------|--------------|
| 32 | 0.980586000  | 0.036801000  | 0.032549000  |
| 9  | 1.580812000  | -1.019428000 | -1.171808000 |
| 9  | -0.300668000 | 1.101629000  | -0.512067000 |
| 9  | 0.650466000  | -0.586246000 | 1.596122000  |
| 9  | -0.857556000 | -1.519134000 | -0.402602000 |
| 9  | 2.262180000  | 1.165475000  | 0.281943000  |
| 1  | -1.749570000 | -1.402675000 | -0.091864000 |
| 1  | -1.913457000 | 1.604374000  | -0.352902000 |
| 9  | -2.840856000 | 1.587714000  | -0.194490000 |
| 1  | -3.270758000 | 0.045360000  | 0.165530000  |
| 9  | -3.210484000 | -0.888307000 | 0.318198000  |

$$E_{\text{B3LYP}} = -2778.122574$$

$$E_{\text{QCISD}} = -2775.126631$$

#### 4HF/GeF<sub>4</sub> (1)

|    |              |              |              |
|----|--------------|--------------|--------------|
| 32 | -1.335337000 | 0.002049000  | -0.067381000 |
| 9  | -2.690792000 | 0.773500000  | -0.804437000 |
| 9  | -1.938271000 | -0.551098000 | 1.436801000  |
| 9  | -0.227059000 | 1.353317000  | 0.072586000  |
| 9  | -0.823053000 | -1.139602000 | -1.242576000 |
| 9  | 0.590799000  | -0.989984000 | 0.976022000  |
| 9  | 2.631073000  | -1.856428000 | -0.176416000 |
| 9  | 2.249029000  | 2.072477000  | 0.315870000  |
| 1  | 1.316753000  | -1.421286000 | 0.522353000  |
| 1  | 1.331532000  | 1.853579000  | 0.273377000  |
| 1  | 3.225983000  | -1.119779000 | -0.293252000 |
| 9  | 3.928670000  | 0.293306000  | -0.379936000 |
| 1  | 3.372952000  | 1.022522000  | -0.127510000 |

$$E_{\text{B3LYP}} = -2878.620767$$

$$E_{\text{QCISD}} = -2875.421609$$

### 5HF/GeF<sub>4</sub> (1)

|    |              |              |              |
|----|--------------|--------------|--------------|
| 32 | 1.765108000  | -0.079810000 | -0.011967000 |
| 9  | 1.582922000  | -0.988006000 | 1.430153000  |
| 9  | 3.428341000  | 0.369518000  | -0.058152000 |
| 9  | 1.485734000  | -0.932478000 | -1.472154000 |
| 9  | 0.979564000  | 1.479746000  | 0.039249000  |
| 9  | -0.679612000 | -0.451238000 | 0.068001000  |
| 9  | -2.269009000 | -2.350984000 | 0.051080000  |
| 9  | -4.339485000 | -0.949644000 | -0.041171000 |
| 9  | -3.724455000 | 1.491397000  | -0.067869000 |
| 1  | -1.193486000 | -1.262773000 | 0.066143000  |
| 1  | -2.844891000 | 1.850863000  | -0.011097000 |
| 1  | -3.124214000 | -1.923883000 | 0.014982000  |
| 1  | -4.141044000 | -0.016349000 | -0.051118000 |
| 9  | -1.418248000 | 2.534440000  | 0.083385000  |
| 1  | -0.591596000 | 2.081289000  | 0.071331000  |

$$E_{\text{B3LYP}} = -2979.118753$$

$$E_{\text{QCISD}} = -2975.716926$$

### 6HF/GeF<sub>4</sub> (1)

|    |              |              |              |
|----|--------------|--------------|--------------|
| 32 | -1.362991000 | -0.286459000 | -0.012828000 |
| 9  | -0.991887000 | -2.032435000 | -0.031001000 |
| 9  | -2.166562000 | -0.185927000 | -1.525325000 |
| 9  | 3.472813000  | 0.489750000  | -0.606872000 |
| 9  | 0.298697000  | 0.219680000  | 0.053109000  |
| 9  | -2.292903000 | -0.250072000 | 1.428889000  |
| 9  | -1.672413000 | 1.829947000  | 0.029353000  |
| 9  | 3.248580000  | -1.817119000 | 0.321551000  |
| 9  | 1.214520000  | -3.254491000 | 0.014004000  |
| 9  | 0.213554000  | 3.319582000  | -0.043241000 |
| 9  | 2.490096000  | 2.530212000  | 0.395402000  |
| 1  | 3.371485000  | -0.395262000 | -0.254780000 |
| 1  | 0.353214000  | -2.849838000 | -0.005039000 |
| 1  | 2.482762000  | -2.376654000 | 0.204690000  |
| 1  | 1.111380000  | 2.990204000  | 0.114341000  |
| 1  | -0.893193000 | 2.432538000  | 0.003541000  |
| 1  | 2.859595000  | 1.723558000  | 0.024911000  |

$$E_{\text{B3LYP}} = -3079.620174$$

$$E_{\text{QCISD}} = -3076.015532$$

The Cartesian coordinates (in Å) of the B3LYP/6-311++G(d,p) higher energy structures of the  $n\text{HF}/\text{GeF}_4$  superacids ( $n=1-6$ ). The corresponding B3LYP/6-311++G(d,p) and QCISD/6-311++G(d,p) energies are given in a.u.

### 2HF/GeF<sub>4</sub> (2)

|    |              |              |              |
|----|--------------|--------------|--------------|
| 32 | -0.240683000 | 0.103150000  | 0.000000000  |
| 9  | 0.443761000  | -1.495460000 | 0.000000000  |
| 9  | -1.169253000 | 0.199894000  | 1.434482000  |
| 9  | 1.114064000  | 1.162619000  | 0.000000000  |
| 9  | 2.654165000  | -3.151381000 | 0.000000000  |
| 9  | -1.169253000 | 2.642594000  | 0.000000000  |
| 9  | -1.169253000 | 0.199894000  | -1.434482000 |
| 1  | 1.886704000  | -2.630119000 | 0.000000000  |
| 1  | -0.522914000 | 3.305877000  | 0.000000000  |

$$E_{\text{B3LYP}} = -2677.615445$$

$$E_{\text{QCISD}} = -2674.823695$$

### 3HF/GeF<sub>4</sub> (2)

|    |              |              |              |
|----|--------------|--------------|--------------|
| 32 | -0.492316000 | -0.093241000 | 0.000000000  |
| 9  | -1.094910000 | -0.735774000 | 1.466175000  |
| 9  | 1.220430000  | 0.224699000  | 0.000000000  |
| 9  | -1.094910000 | -0.735774000 | -1.466175000 |
| 9  | 0.486307000  | -2.317078000 | 0.000000000  |
| 9  | -1.108117000 | 1.538899000  | 0.000000000  |
| 1  | 1.432721000  | -2.345353000 | 0.000000000  |
| 1  | 2.823981000  | -0.842834000 | 0.000000000  |
| 9  | 2.998124000  | -1.760651000 | 0.000000000  |
| 1  | -0.532443000 | 3.265187000  | 0.000000000  |
| 9  | -0.110267000 | 4.092239000  | 0.000000000  |

$$E_{\text{B3LYP}} = -2778.112658$$

$$E_{\text{QCISD}} = -2775.118792$$

### 3HF/GeF<sub>4</sub> (3)

|    |              |              |              |
|----|--------------|--------------|--------------|
| 32 | -0.260784000 | 0.197759000  | 0.000000000  |
| 9  | -0.212827000 | 0.180244000  | 1.748102000  |
| 9  | -0.287833000 | -1.853533000 | 0.000000000  |
| 9  | -1.995506000 | 0.532594000  | 0.000000000  |
| 9  | -0.212827000 | 2.390251000  | 0.000000000  |
| 9  | 1.561234000  | 0.180374000  | 0.000000000  |
| 9  | -0.212827000 | 0.180244000  | -1.748102000 |
| 1  | 0.635542000  | -2.203861000 | 0.000000000  |
| 1  | -1.121248000 | 2.617708000  | 0.000000000  |
| 9  | 2.096036000  | -2.218866000 | 0.000000000  |
| 1  | 2.211717000  | -1.263902000 | 0.000000000  |

$$E_{\text{B3LYP}} = -2778.090862$$

$$E_{\text{QCISD}} = -2775.097448$$

### 4HF/GeF<sub>4</sub> (2)

|    |              |              |              |
|----|--------------|--------------|--------------|
| 32 | 0.000000000  | 0.000000000  | 0.000000000  |
| 9  | 0.000000000  | 0.000000000  | -1.744263078 |
| 9  | -1.601931342 | -1.301888281 | 0.000000000  |
| 9  | 1.601931342  | 1.301888281  | 0.000000000  |
| 9  | 1.186150736  | -1.372781640 | 0.000000000  |
| 9  | -1.186150736 | 1.372781640  | 0.000000000  |
| 9  | 0.000000000  | 0.000000000  | 1.744263078  |
| 1  | -2.456465881 | -0.813621282 | 0.000000000  |
| 1  | 2.456465881  | 0.813621282  | 0.000000000  |
| 9  | -3.408241558 | 0.307397315  | 0.000000000  |
| 1  | -2.741283393 | 0.996834830  | 0.000000000  |
| 9  | 3.408241558  | -0.307397315 | 0.000000000  |
| 1  | 2.741283393  | -0.996834830 | 0.000000000  |

$E_{B3LYP} = -2878.599339$

$E_{QCISD} = -2875.402882$

### 5HF/GeF<sub>4</sub> (2)

|    |              |              |              |
|----|--------------|--------------|--------------|
| 32 | -0.304888000 | 0.184144000  | 0.200982000  |
| 9  | 0.184465000  | -0.251770000 | -1.403059000 |
| 9  | -1.613600000 | 1.311212000  | -0.218376000 |
| 9  | -0.802548000 | -0.199681000 | 1.804176000  |
| 9  | 1.012225000  | 1.330819000  | 0.535794000  |
| 9  | 1.092295000  | -1.433072000 | 0.661256000  |
| 9  | 3.248365000  | -1.255455000 | -0.512468000 |
| 9  | 3.356418000  | 1.250388000  | -0.422795000 |
| 9  | -3.778350000 | 0.084707000  | -0.735340000 |
| 9  | -1.834867000 | -1.429671000 | -0.253233000 |
| 1  | 1.922323000  | -1.465474000 | 0.157674000  |
| 1  | 2.498762000  | 1.464163000  | -0.073478000 |
| 1  | 3.439981000  | -0.318840000 | -0.561424000 |
| 1  | -3.192724000 | 0.814426000  | -0.598639000 |
| 1  | -2.691555000 | -1.054177000 | -0.459137000 |

$E_{B3LYP} = -2979.110667$

$E_{QCISD} = -2975.713852$

### 5HF/GeF<sub>4</sub> (3)

|    |              |              |              |
|----|--------------|--------------|--------------|
| 32 | -0.821795000 | -0.303916000 | 0.165224000  |
| 9  | 0.254874000  | 1.064329000  | 0.374818000  |
| 9  | -0.582919000 | -1.130214000 | -1.318597000 |
| 9  | -2.280041000 | 0.596174000  | -0.173889000 |
| 9  | -1.262467000 | -1.130366000 | 1.596885000  |
| 9  | 1.095203000  | -1.387426000 | 0.653243000  |
| 9  | 3.077461000  | -1.393288000 | -0.802036000 |
| 9  | 4.249221000  | 0.798196000  | -0.538294000 |
| 9  | 2.519039000  | 2.322848000  | 0.523285000  |
| 9  | -4.901938000 | 1.086981000  | -0.804998000 |
| 1  | 1.853117000  | -1.447452000 | 0.053619000  |
| 1  | 1.652146000  | 1.954142000  | 0.542751000  |
| 1  | 3.608084000  | -0.597171000 | -0.748303000 |
| 1  | 3.683879000  | 1.453156000  | -0.142475000 |
| 1  | -4.015689000 | 0.917543000  | -0.586508000 |

$E_{B3LYP} = -2979.110055$

$E_{QCISD} = -2975.710226$

### 5HF/GeF<sub>4</sub> (4)

|    |              |              |              |
|----|--------------|--------------|--------------|
| 32 | -0.310582000 | 0.318977000  | 0.160966000  |
| 9  | 0.505174000  | -1.243117000 | -0.300465000 |
| 9  | -1.791060000 | -0.802427000 | 1.097791000  |
| 9  | 1.129133000  | 1.294382000  | -0.849160000 |
| 9  | 0.644333000  | 0.327576000  | 1.626504000  |
| 9  | -1.276554000 | 0.110190000  | -1.354130000 |
| 9  | -1.158668000 | 1.798587000  | 0.512002000  |
| 1  | -2.550958000 | -0.977471000 | 0.504580000  |
| 1  | 2.083028000  | 1.003140000  | -0.723266000 |
| 9  | -3.384704000 | -1.016282000 | -0.727248000 |
| 1  | -2.741563000 | -0.562875000 | -1.270881000 |
| 9  | 3.345978000  | 0.491658000  | -0.554197000 |
| 1  | 3.304754000  | -0.431247000 | -0.243781000 |
| 1  | 1.910750000  | -1.752960000 | 0.078656000  |
| 9  | 2.867771000  | -1.792330000 | 0.160434000  |

$E_{B3LYP} = -2979.102095$

$E_{QCISD} = -2975.703747$

### 6HF/GeF<sub>4</sub> (2)

|    |              |              |              |
|----|--------------|--------------|--------------|
| 32 | 2.066409000  | -0.143282000 | -0.012962000 |
| 9  | 1.794530000  | -0.897991000 | 1.502018000  |
| 9  | 1.737601000  | -1.088924000 | -1.405897000 |
| 9  | 3.767119000  | 0.135249000  | -0.062580000 |
| 9  | 1.459631000  | 1.495331000  | -0.112156000 |
| 9  | -0.358486000 | -0.293261000 | 0.049325000  |
| 9  | -1.685524000 | -2.376378000 | 0.198245000  |
| 9  | -4.128290000 | -1.955106000 | -0.052021000 |
| 9  | -4.597374000 | 0.468567000  | -0.451349000 |
| 9  | -3.008235000 | 2.067042000  | 0.635215000  |
| 1  | -0.838521000 | -1.125070000 | 0.112645000  |
| 1  | -4.009619000 | 1.114757000  | -0.064143000 |
| 1  | -2.635222000 | -2.280256000 | 0.106331000  |
| 1  | -4.373047000 | -1.042700000 | -0.204264000 |
| 1  | -2.156073000 | 2.331618000  | 0.298960000  |
| 9  | -0.772783000 | 2.811552000  | -0.259857000 |
| 1  | 0.013715000  | 2.291958000  | -0.203248000 |

$E_{B3LYP} = -3079.616070$

$E_{QCISD} = -3076.011103$

### 6HF/GeF<sub>4</sub> (3)

|    |              |              |              |
|----|--------------|--------------|--------------|
| 32 | 0.000000000  | 0.000000000  | 0.000000000  |
| 9  | 0.376687000  | -0.560724000 | 1.684631000  |
| 9  | 1.909328000  | 0.629154000  | -0.229522000 |
| 9  | -1.909328000 | -0.629154000 | 0.229522000  |
| 9  | 0.418682000  | -1.587415000 | -0.597152000 |
| 9  | -0.418682000 | 1.587415000  | 0.597152000  |
| 9  | -0.376687000 | 0.560724000  | -1.684631000 |
| 1  | 2.060775000  | 1.535367000  | -0.632295000 |
| 1  | -2.060775000 | -1.535367000 | 0.632295000  |
| 9  | 2.171153000  | 2.749058000  | -1.278759000 |
| 1  | 1.382132000  | 2.917319000  | -1.824803000 |
| 9  | -2.171153000 | -2.749058000 | 1.278759000  |
| 1  | -1.382132000 | -2.917319000 | 1.824803000  |
| 1  | 0.265862000  | -1.966188000 | 2.293973000  |
| 9  | -0.092077000 | -2.819422000 | 2.557964000  |
| 1  | -0.265862000 | 1.966188000  | -2.293973000 |
| 9  | 0.092077000  | 2.819422000  | -2.557964000 |

$E_{B3LYP} = -3079.606432$

$E_{QCISD} = -3076.005231$

### 6HF/GeF<sub>4</sub> (4)

|    |              |              |              |
|----|--------------|--------------|--------------|
| 32 | -0.545624000 | 0.374283000  | -0.122934000 |
| 9  | -1.487485000 | 1.545186000  | -0.996274000 |
| 9  | 0.393943000  | -0.894494000 | 0.755545000  |
| 9  | -2.039467000 | 0.167042000  | 1.305218000  |
| 9  | 0.900310000  | 0.459895000  | -1.475754000 |
| 9  | 0.210707000  | 1.596893000  | 0.913417000  |
| 9  | -1.367739000 | -0.982306000 | -0.994589000 |
| 9  | 2.932401000  | -0.705235000 | -1.315474000 |
| 9  | -3.449246000 | -1.500541000 | 0.239722000  |
| 9  | 2.721572000  | -1.852463000 | 0.833012000  |
| 1  | -2.730201000 | -0.473064000 | 1.032360000  |
| 1  | 1.798124000  | -0.026248000 | -1.399713000 |
| 1  | -2.796472000 | -1.536812000 | -0.457196000 |
| 1  | 3.008626000  | -1.152245000 | -0.452146000 |
| 1  | 1.849442000  | -1.534503000 | 1.041692000  |
| 9  | 2.785984000  | 1.190211000  | 1.066640000  |
| 1  | 1.921612000  | 1.528133000  | 1.185739000  |

$$E_{\text{B3LYP}} = -3079.595273$$

$$E_{\text{QCISD}} = -3075.997437$$

The Cartesian coordinates (in Å) of the B3LYP/6-311++G(d,p) lowest energy structures of the  $((n-1)\text{HF}/\text{GeF}_5)^-$  anions ( $n=1-6$ ). The corresponding B3LYP/6-311++G(d,p) and QCISD/6-311++G(d,p) energies are given in a.u.

**GeF<sub>5</sub><sup>-</sup>**

|    |              |              |              |
|----|--------------|--------------|--------------|
| 32 | 0.000000000  | 0.000000000  | 0.000208000  |
| 9  | 0.000000000  | 0.000000000  | 1.777983000  |
| 9  | 0.000000000  | 1.538744000  | -0.890055000 |
| 9  | 0.000000000  | -1.538744000 | -0.890055000 |
| 9  | 1.805531000  | 0.000000000  | 0.000693000  |
| 9  | -1.805531000 | 0.000000000  | 0.000693000  |

$$E_{\text{B3LYP}} = -2576.664238$$

$$E_{\text{QCISD}} = -2574.065767$$

**(HF/GeF<sub>5</sub>)<sup>-</sup>**

|    |              |              |              |
|----|--------------|--------------|--------------|
| 32 | 0.334907000  | 0.360825000  | 0.000000000  |
| 9  | 1.114634000  | -0.069922000 | 1.524150000  |
| 9  | -1.274831000 | 1.086803000  | 0.000000000  |
| 9  | 1.114634000  | 1.976683000  | 0.000000000  |
| 9  | 1.114634000  | -0.069922000 | -1.524150000 |
| 9  | -0.469425000 | -1.303437000 | 0.000000000  |
| 9  | -2.588655000 | -2.668330000 | 0.000000000  |
| 1  | -1.815949000 | -2.113260000 | 0.000000000  |

$$E_{\text{B3LYP}} = -2677.173467$$

$$E_{\text{QCISD}} = -2674.373237$$

**(2HF/GeF<sub>5</sub>)<sup>-</sup>**

|    |              |              |              |
|----|--------------|--------------|--------------|
| 32 | -0.000778723 | -0.000011421 | 0.000000000  |
| 9  | 0.001055279  | -0.000005912 | -1.829413500 |
| 9  | 1.755495272  | 0.008368632  | 0.000000000  |
| 9  | -0.875360326 | -1.522644037 | 0.000000000  |
| 9  | -0.889815127 | 1.514220052  | 0.000000000  |
| 9  | 0.001055279  | -0.000005912 | 1.829413500  |
| 9  | 0.005112482  | 0.000054051  | -4.368084000 |
| 9  | 0.005112482  | 0.000054051  | 4.368084000  |
| 1  | 0.003531083  | 0.000033127  | -3.421528500 |
| 1  | 0.003531083  | 0.000033127  | 3.421528500  |

$$E_{\text{B3LYP}} = -2777.680213$$

$$E_{\text{QCISD}} = -2774.678262$$

**(3HF/GeF<sub>5</sub>)<sup>-</sup>**

|    |              |              |              |
|----|--------------|--------------|--------------|
| 32 | -0.158058000 | 0.115673000  | 0.000000000  |
| 9  | -0.186120000 | -1.704946000 | 0.000000000  |
| 9  | -0.009761000 | 1.928270000  | 0.000000000  |
| 9  | -1.028800000 | 0.157403000  | 1.518668000  |
| 9  | 1.622527000  | 0.032198000  | 0.000000000  |
| 9  | -1.028800000 | 0.157403000  | -1.518668000 |
| 9  | -1.028800000 | 4.280589000  | 0.000000000  |
| 9  | -1.694319000 | -3.784753000 | 0.000000000  |
| 9  | 3.790426000  | -1.416091000 | 0.000000000  |
| 1  | -0.681098000 | 3.402851000  | 0.000000000  |
| 1  | 2.974533000  | -0.950484000 | 0.000000000  |
| 1  | -1.162769000 | -3.004574000 | 0.000000000  |

$$E_{\text{B3LYP}} = -2878.181301$$

$$E_{\text{QCISD}} = -2874.978405$$



**(4HF/GeF<sub>5</sub>)<sup>-</sup>**

|    |              |              |              |
|----|--------------|--------------|--------------|
| 32 | 0.045100000  | 0.270171000  | 0.000000000  |
| 9  | -1.281364000 | 1.496319000  | 0.000000000  |
| 9  | 1.300004000  | -1.033655000 | 0.000000000  |
| 9  | 1.266536000  | 1.516680000  | 0.000000000  |
| 9  | -0.584135000 | -0.365851000 | 1.534354000  |
| 9  | -0.584135000 | -0.365851000 | -1.534354000 |
| 9  | 3.847515000  | -1.533872000 | 0.000000000  |
| 9  | -2.905890000 | 3.505241000  | 0.000000000  |
| 9  | -0.584135000 | -2.009188000 | 3.584075000  |
| 9  | -0.584135000 | -2.009188000 | -3.584075000 |
| 1  | 2.930800000  | -1.322545000 | 0.000000000  |
| 1  | -0.537710000 | -1.452627000 | 2.831565000  |
| 1  | -2.310953000 | 2.776618000  | 0.000000000  |
| 1  | -0.537710000 | -1.452627000 | -2.831565000 |

**E<sub>B3LYP</sub> = -2978.680067**  
**E<sub>QCISD</sub> = -2975.276950**

**(5HF/GeF<sub>5</sub>)<sup>-</sup>**

|    |              |              |              |
|----|--------------|--------------|--------------|
| 32 | 0.201444000  | 0.081377000  | 0.000000000  |
| 9  | 1.263227000  | -1.371337000 | 0.000000000  |
| 9  | 1.562435000  | 1.167913000  | 0.000000000  |
| 9  | -0.549715000 | -0.438044000 | 1.513674000  |
| 9  | -0.549715000 | -0.438044000 | -1.513674000 |
| 9  | -0.938285000 | 1.532496000  | 0.000000000  |
| 9  | 3.722419000  | -2.253277000 | 0.000000000  |
| 9  | -3.579595000 | 1.562588000  | 0.000000000  |
| 9  | -0.397586000 | 4.128895000  | 0.000000000  |
| 9  | -0.549715000 | -2.076308000 | -3.603780000 |
| 9  | -0.549715000 | -2.076308000 | 3.603780000  |
| 1  | 2.848302000  | -1.911279000 | 0.000000000  |
| 1  | -0.516665000 | -1.535052000 | 2.842061000  |
| 1  | -2.643066000 | 1.529456000  | 0.000000000  |
| 1  | -0.516665000 | -1.535052000 | -2.842061000 |
| 1  | -0.521915000 | 3.200706000  | 0.000000000  |

**E<sub>B3LYP</sub> = -3079.176735**  
**E<sub>QCISD</sub> = -3075.573072**
